# Supplementary material for: Transporter genes identified in landraces associated with high zinc in polished rice through panicle transcriptome for biofortification
Source: PLoS One. 2018 Feb 2;13(2):e0192362. doi: 10.1371/journal.pone.0192362 (PMC5796704; doi:10.1371/journal.pone.0192362)
Supplement: S1 Table — (XLSX) [file pone.0192362.s004.xlsx]

## Sheet: Sheet1
Supplementary Table 1. Details of agro-morphological traits, yield and quality parameters of BPT 5204, Chittimutyalu and Kala Jeera Joha across years
	GENOTYPE	BPT 5204	BPT 5204	BPT 5204	Chittimutyalu	Chittimutyalu	Chittimutyalu	Kala Jeera Joha	Kala Jeera Joha	Kala Jeera Joha
	YEAR	2013	2014	2015	2013	2014	2015	2013	2014	2015
1	Plant height (cm)	89	94	96	137	137	137	145.8	147.1	145
2	Productive tillers/hill	11	12	11	15	14	16	12	17	12
3	Panicle length (cm)	22	23	23	28.1	29.4	27.9	28	28	28
4	Grain yield(kg ha-1)	5987	5935	6125	3250	3975	3845	3364	3691	3550
5	Thousand grain weight (g)	21.3	19.5	22.1	16.1	17.5	16.9	16.7	17.5	16.5
6	Days to 50% flowering	114	117	112	106	101	100	95	100	99
7	Days to maturity	144	145	143	131	129	128	124	128	118
8	Hulling %	75.1	79.8	78.8	76.7	77.8	78.1	77.3	75.8	76.1
9	Milling %	65.8	69.2	71.3	70.3	71.4	72.3	68.1	61.9	66.4
10	Head rice recovery %	61.8	66.3	68.2	64.1	63.2	69.4	63.1	58.9	61.3
11	Kernal length (mm)	4.75	5.23	5.12	4.9	4.51	4.6	4.12	4.15	4.13
12	Kernel breadth (mm)	1.77	1.96	1.89	2.09	2.12	2.31	2.09	2.07	2.08
13	Length/Breadth Ratio (mm)	2.68	2.66	2.65	2.11	2.12	2.13	1.97	1.99	1.98
14	Grain chalkiness (%)	Absent	Absent	Absent	Absent	Absent	Absent	Very occassionally present	Very occassionally present	Very occassionally present
15	Grain type	Medium Slender	Medium Slender	Medium Slender	Short Bold	Short Bold	Short Bold	Short Bold	Short Bold	Short Bold
16	Alkali spreading value	4	4	5	5.1	5	4	5	4	4
17	Gel consistency	22	42	41	26	22	29	42	40	41
18	Amylose %	24.08	24.31	24.3	25.56	25.13	24.9	24.4	23.9	24.31
19	Elongation ratio	2.1	2.2	2.3	1.88	1.79	1.81	1.41	1.51	1.46
20	Water uptake	170	180	175	123	125	136	168	173	170
21	Kernel length after cooking	10.3	11.1	10.7	8.9	8.5	8.9	6.1	6.7	6.3
22	Volume expansion ratio	4.7	4.9	4.8	5.7	5.5	5.6	4	5	5
23	Aroma	No	No	No	Strong	Strong	Strong	Strong	Strong	Strong
24	Protein %	6.5	6.9	6.2	7.1	7.2	7.3	7.2	7.1	7.5
